# Supplementary material
Source: PubMed Central journal article supplement (PMC8488015)

**A**

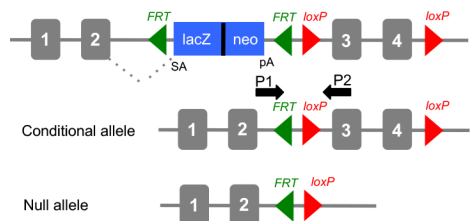

**B**

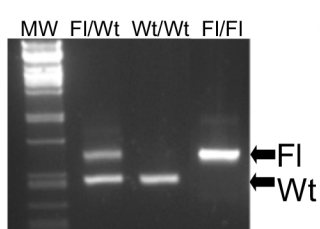

Primer P1 – Primer P2 PCR

Wt allele: 576 bp

Conditional allele (Neo excised): 706 bp

**C**

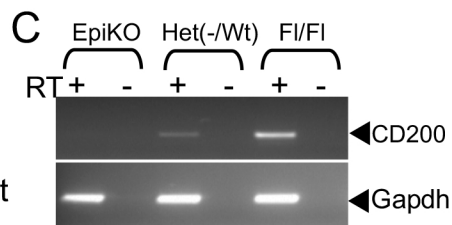

**D**

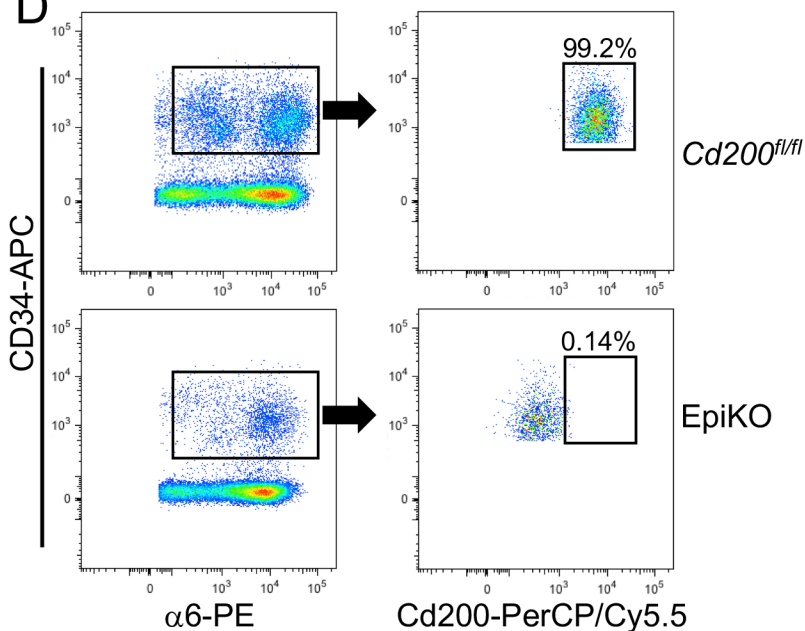

**E**

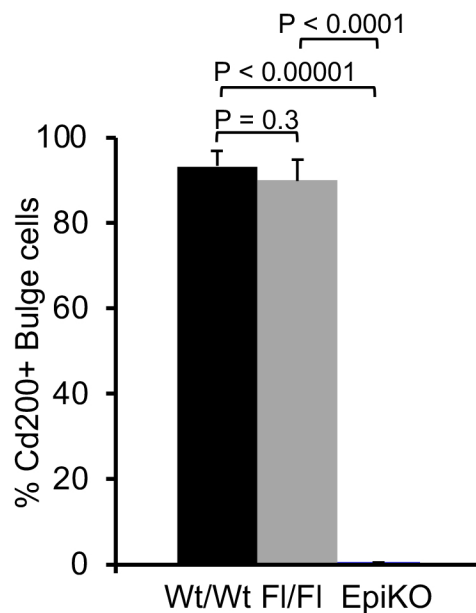

**F**

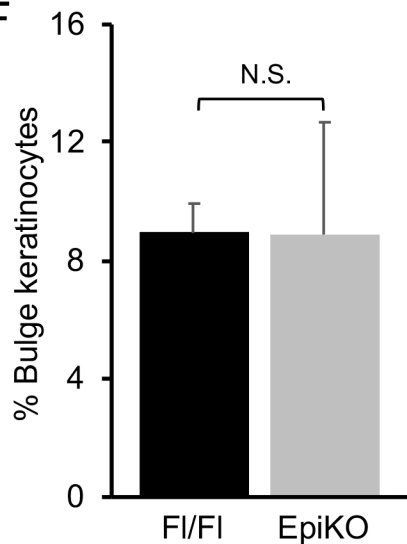

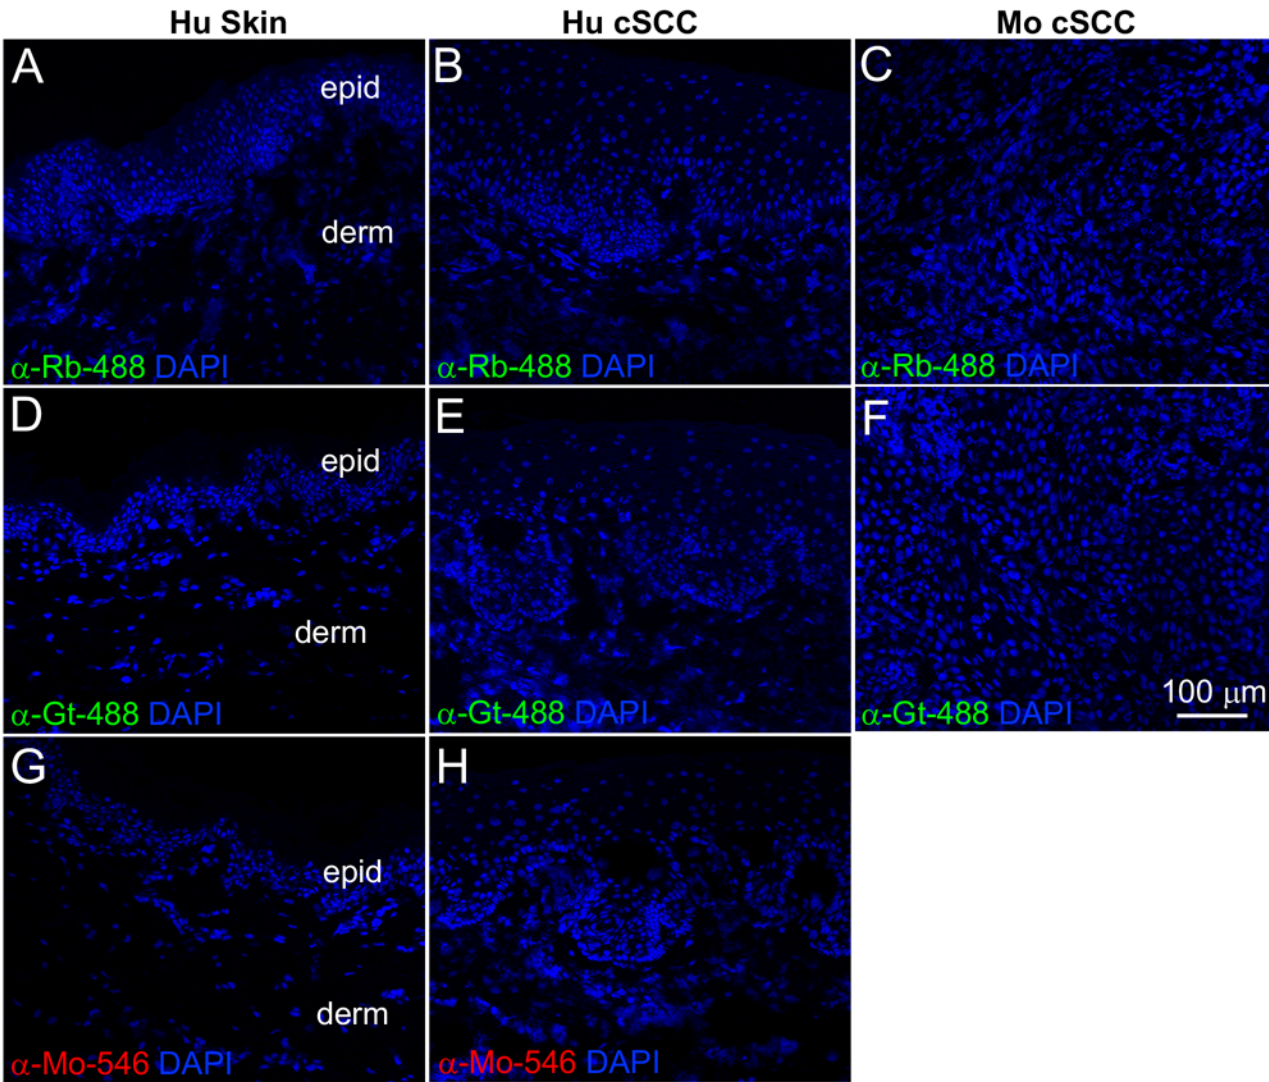

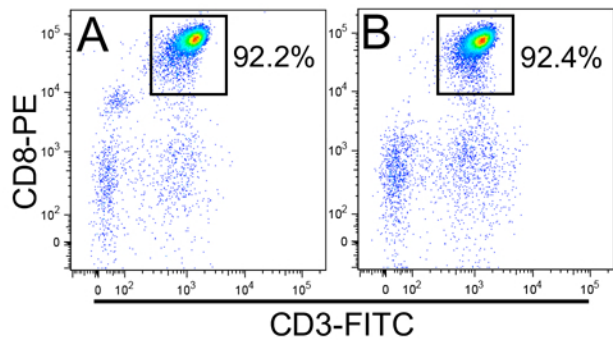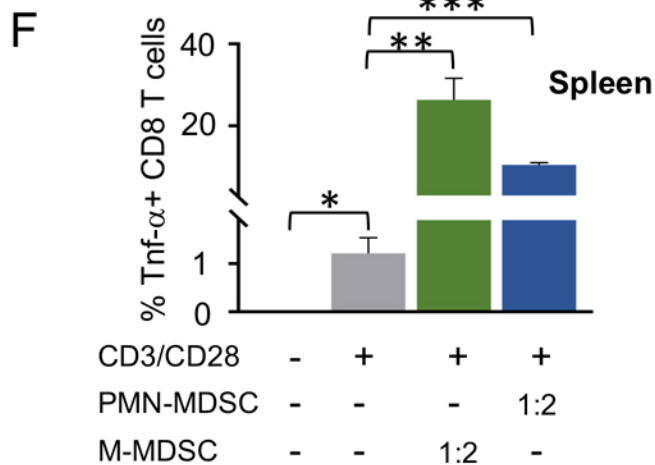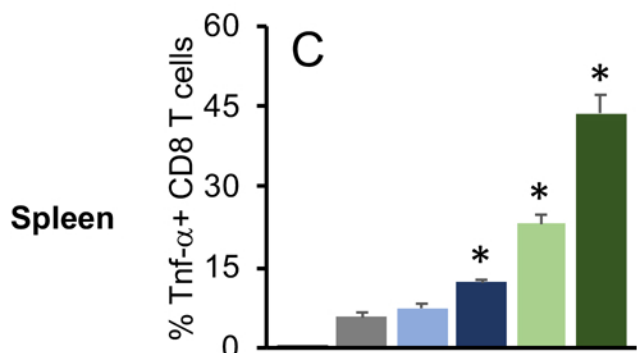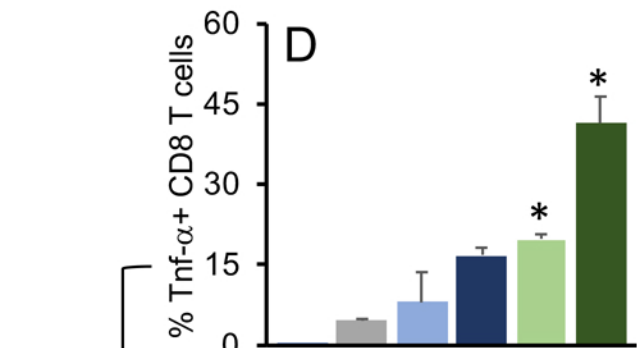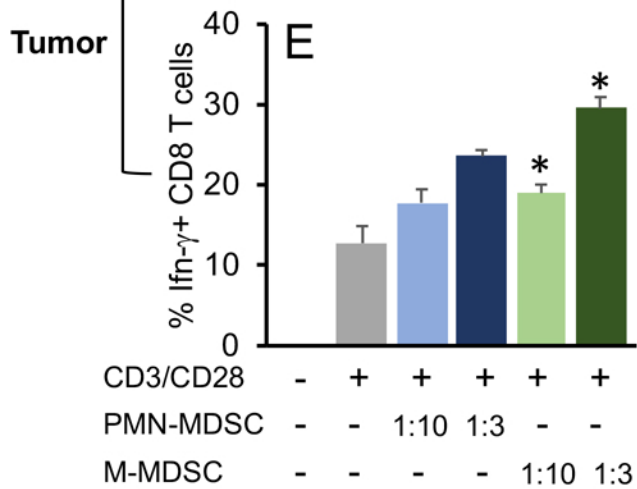

**cSCC**

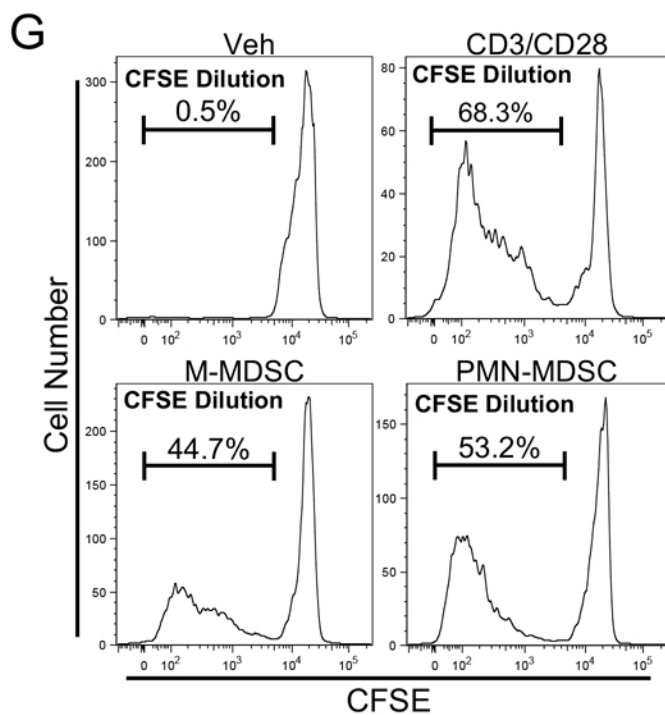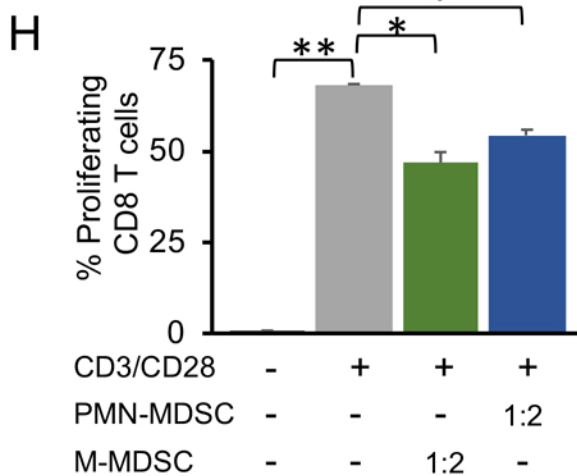

**B16F10**

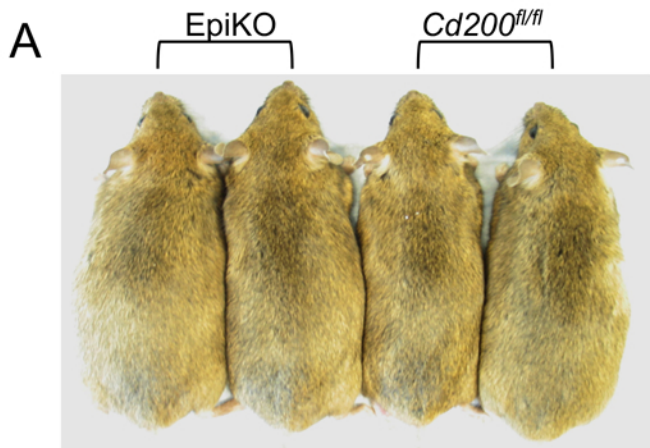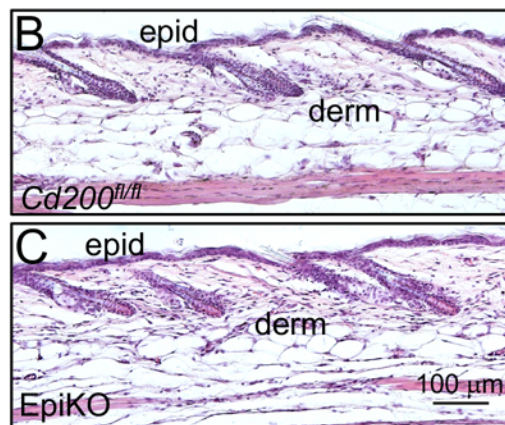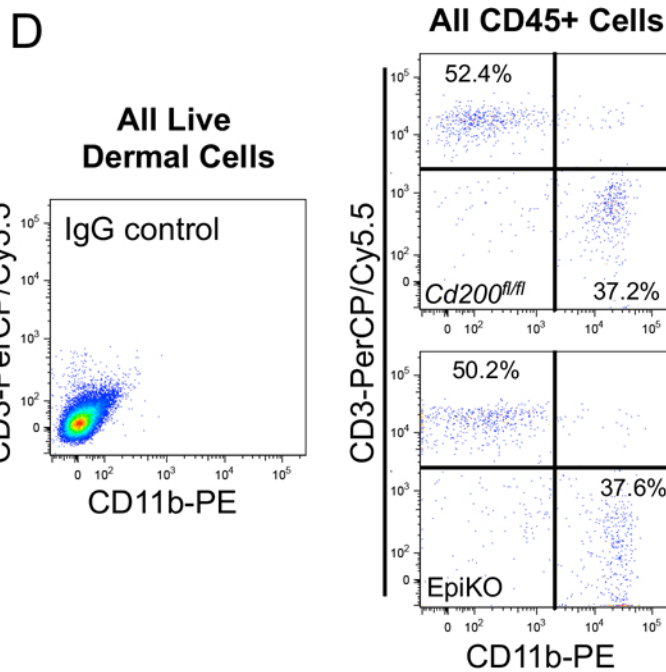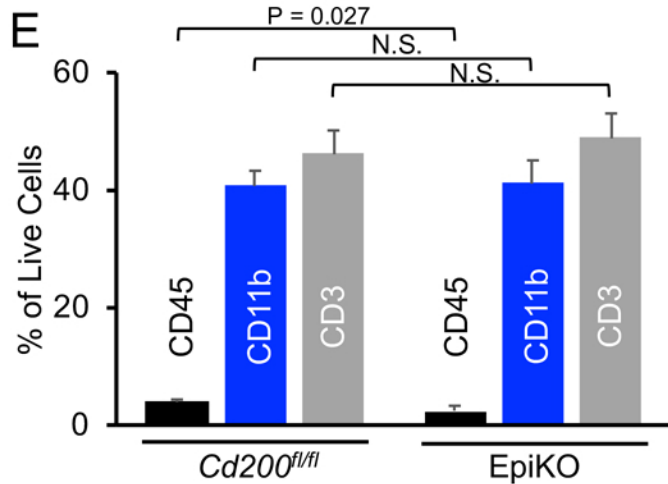



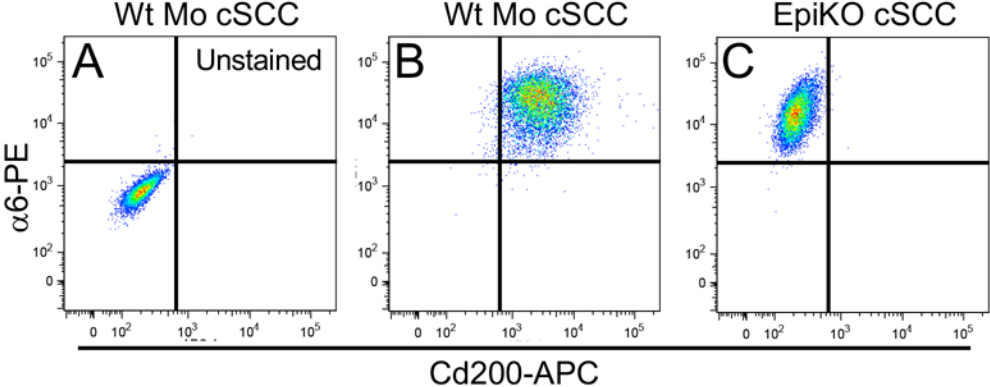

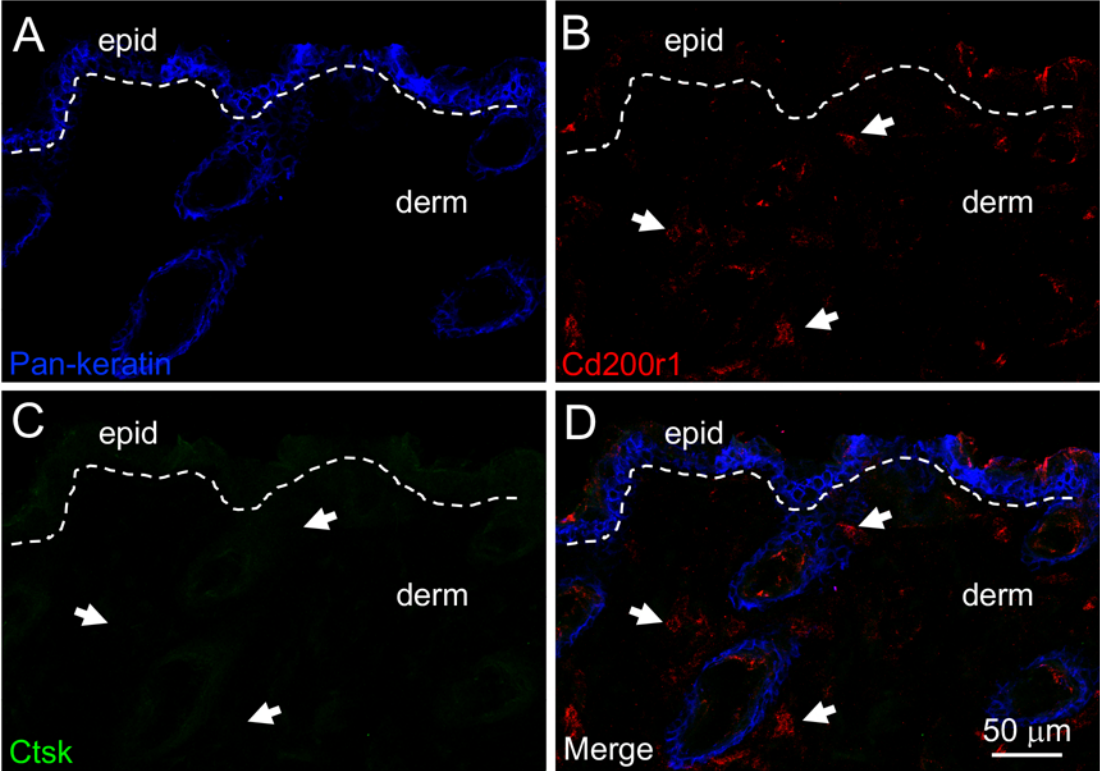

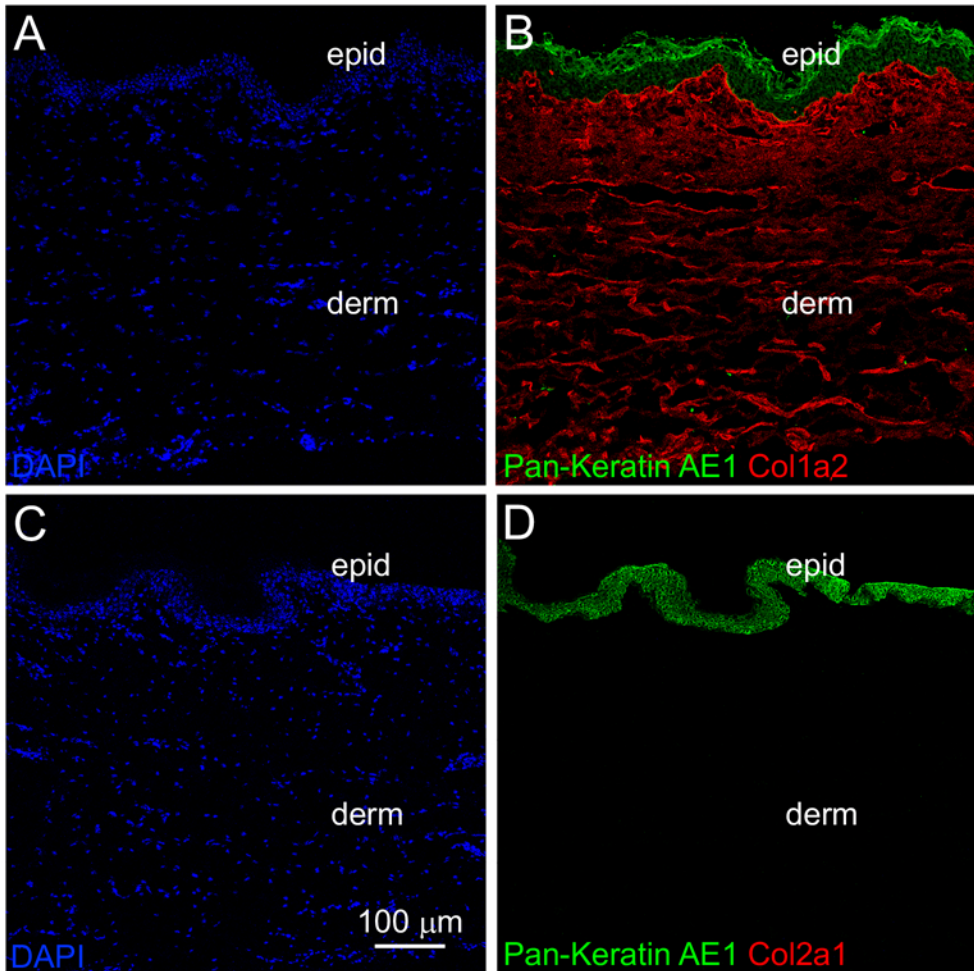

Supplement: NIHMS1721363-supplement-2.pdf [file NIHMS1721363-supplement-2.pdf]
